# Supplementary material for: Metabolite Profiling of Eastern Teaberry (Gaultheria procumbens L.) Lipophilic Leaf Extracts with Hyaluronidase and Lipoxygenase Inhibitory Activity
Source: MDPI journal article supplement (doi:10.3390/molecules22030412), 2017-03-06
Supplement: s1 [file s1]

## Supplementary Materials

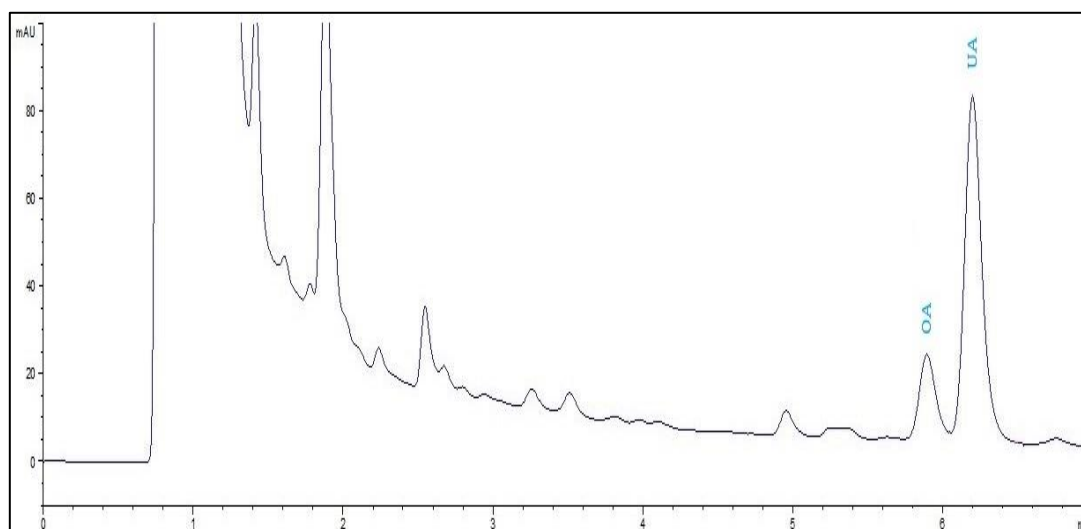

**Figure S3.** UHPLC chromatogram of *G. procumbens* triterpene acids fraction. OA, oleanolic acid; UA, ursolic acid.
