# Supplementary figures and images for: Metabolite Profiling of Eastern Teaberry (Gaultheria procumbens L.) Lipophilic Leaf Extracts with Hyaluronidase and Lipoxygenase Inhibitory Activity
Source: MDPI journal article supplement (doi:10.3390/molecules22030412), 2017-03-06

## Supplementary Materials

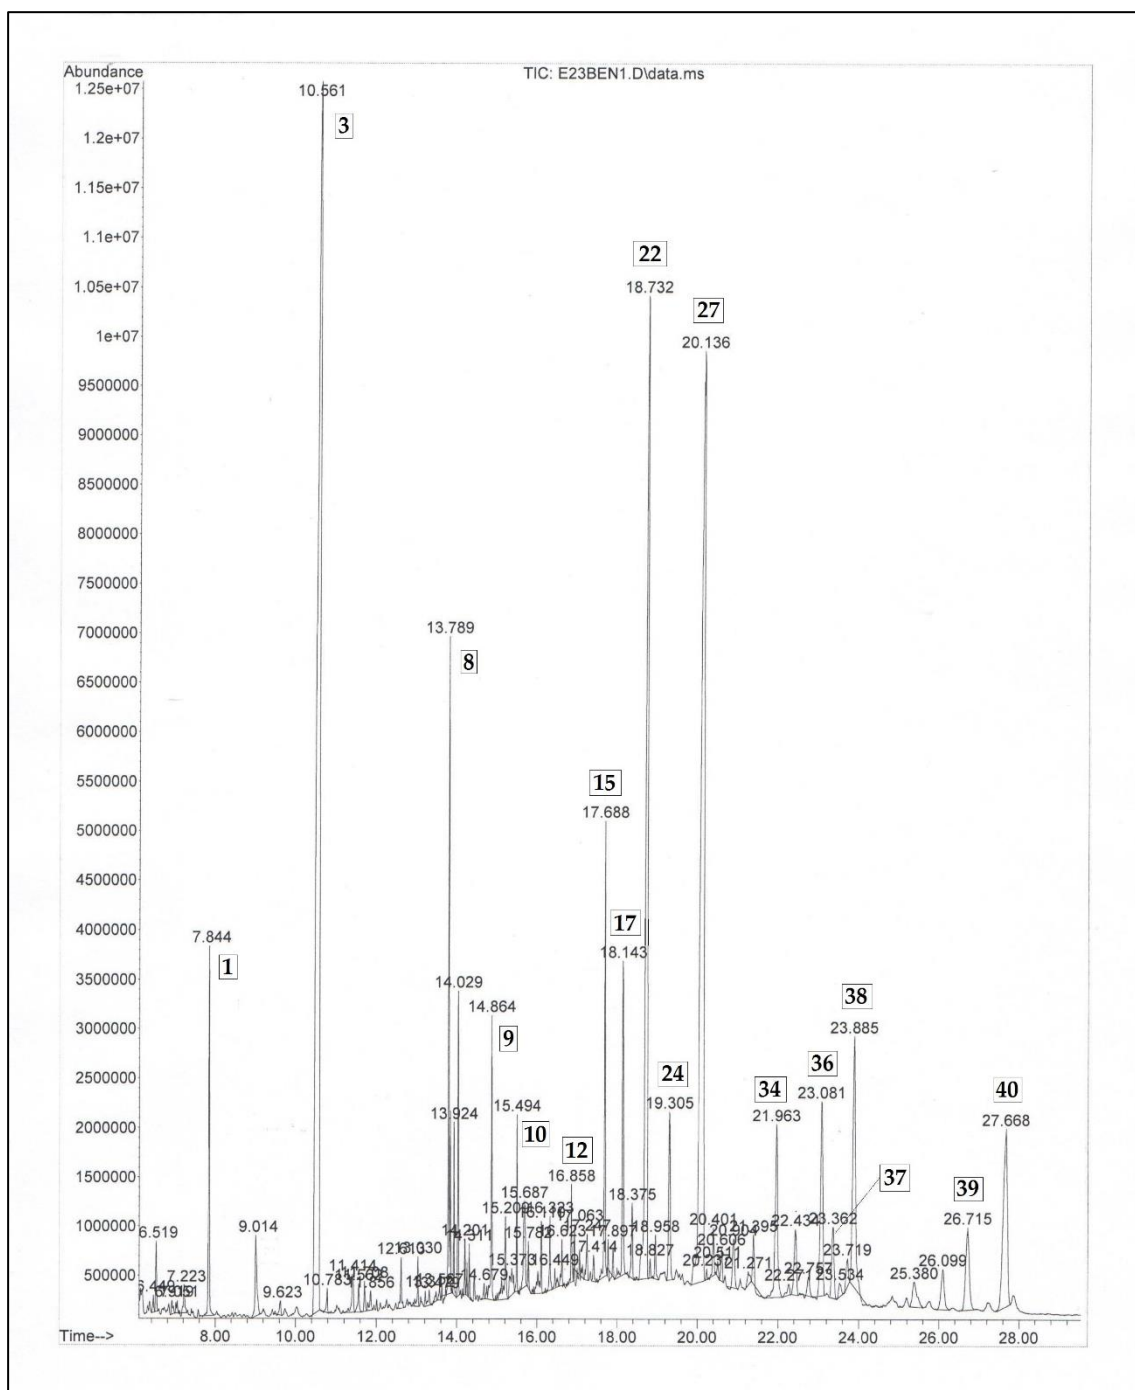

Figure S1. GC chromatogram of *G. procumbens* petrol extract.

Supplement: s1 [file s1]

## Supplementary Materials

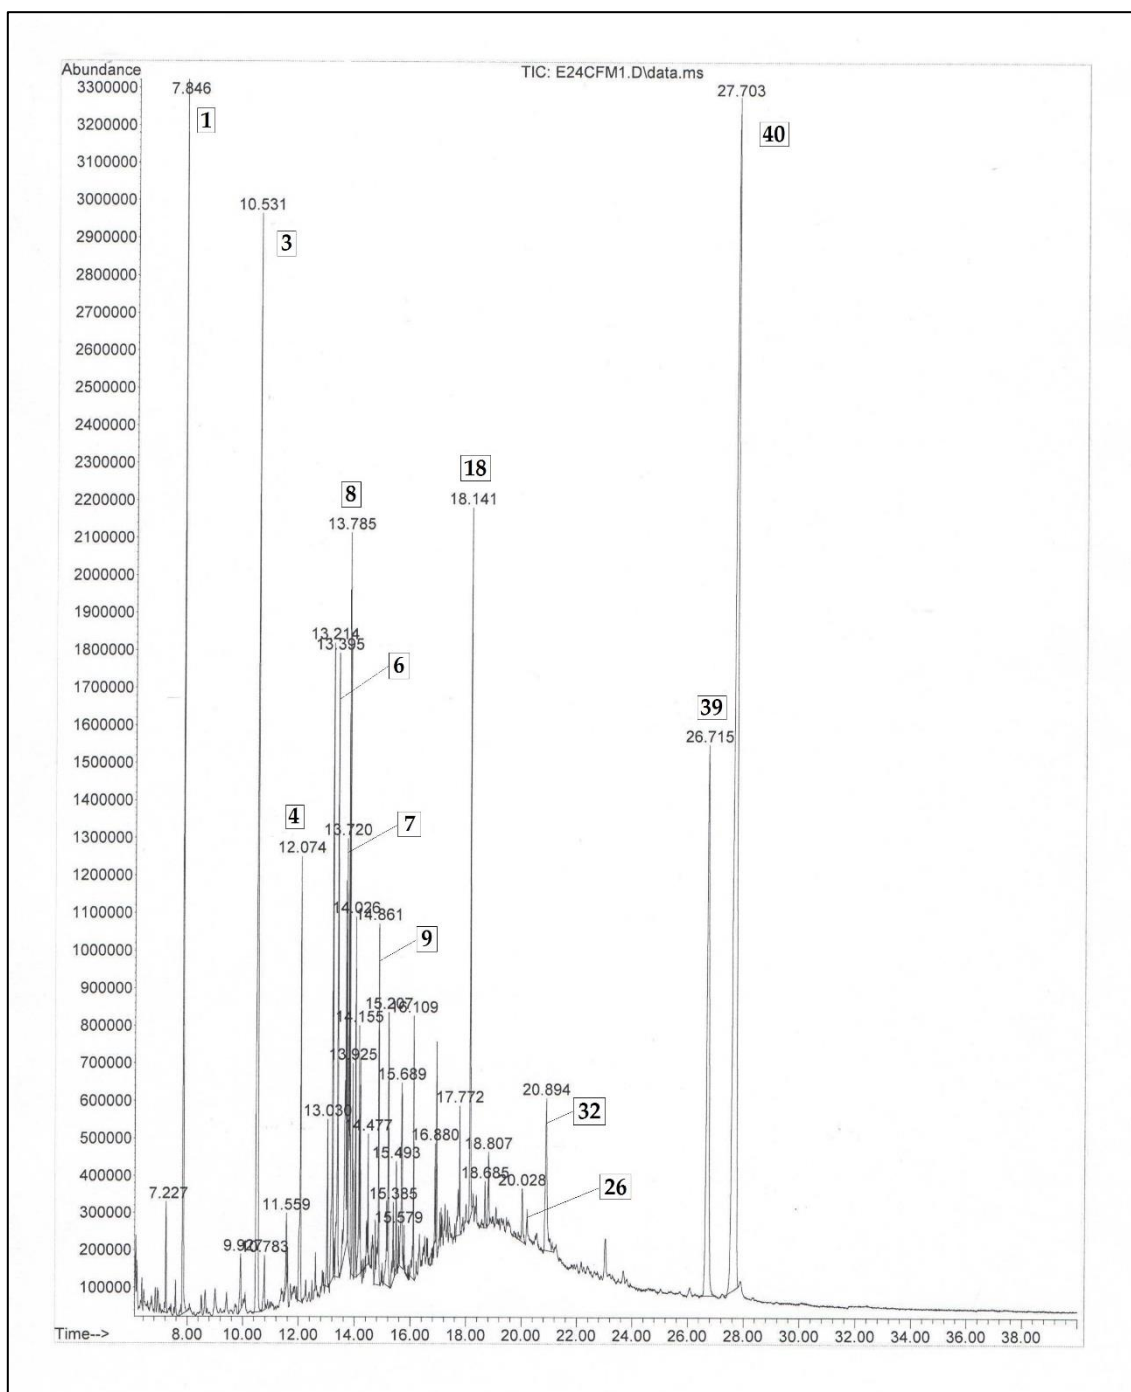

**Figure S2.** GC chromatogram of *G. procumbens* chloroform extract.

Supplement: s1 [file s1]
